# Supplementary material
Source: publisher figshare collection journal article supplement (https://acs.figshare.com/ndownloader/files/10973717)
Supplement: Supplementary file 1 [file 10973717]

## Supporting Information

### **Probing Recombination Mechanism and Realization of Marcus Normal Region Behavior in DSSCs Employing Cobalt Electrolytes and Triphenylamine Dyes**

*Suraj Soman,<sup>a,b\*</sup> Sourava C. Pradhan,<sup>a</sup> Muhammed Yoosuf,<sup>a</sup> Manikkedath V. Vinayak,<sup>a</sup> Sivasankaran Lingamoorthy,<sup>a,b</sup> and Karical R. Gopidas<sup>a,b\*</sup>*

<sup>a</sup>Photosciences and Photonics Section, Chemical Sciences and Technology Division, CSIR-National Institute for Interdisciplinary Science and Technology, Thiruvananthapuram 695019, Kerala, India. <sup>b</sup>Academy of Scientific and Innovative Research (AcSIR), New Delhi 110001, India.

E-mail: [suraj@niist.res.in](mailto:suraj@niist.res.in); [suraj.csir@gmail.com](mailto:suraj.csir@gmail.com); [gopidaskr@gmail.com](mailto:gopidaskr@gmail.com)

## General procedure for the synthesis of cobalt complexes

1eq. of  $\text{CoCl}_2 \cdot 6\text{H}_2\text{O}$  and 3eq. of polypyridine ligand were dissolved in minimal amount of methanol, and the solution was stirred at  $65^\circ\text{C}$  and reflux for 3-4 hours. An excess of potassium hexafluorophosphate was then added to the solution to precipitate the compound that was filtered, washed with methanol and ethanol, dried under vacuum and used without purification.

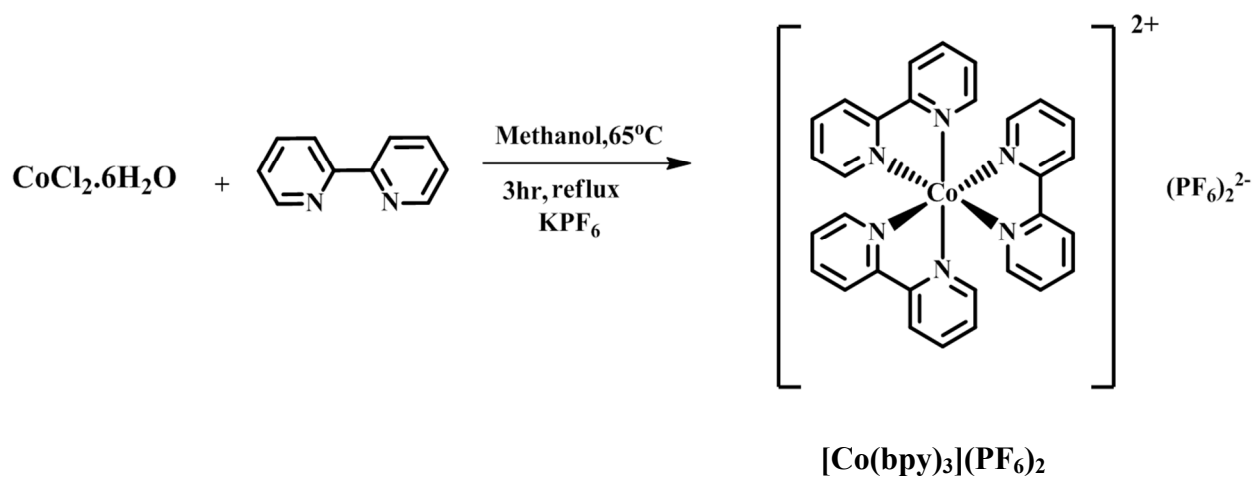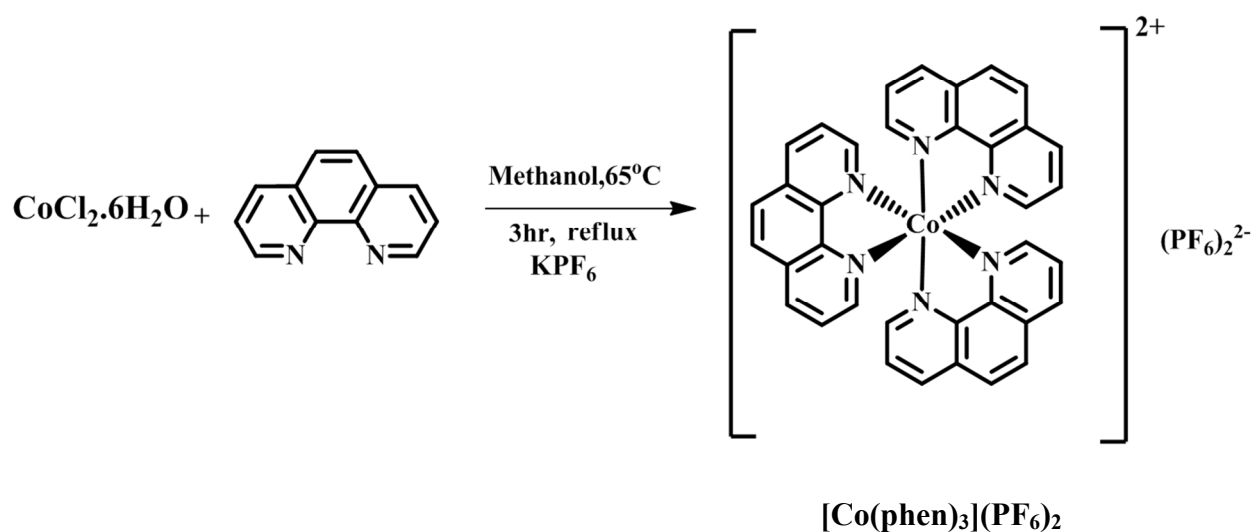

### General procedure for the oxidation of cobalt (II) to cobalt (III)

Oxidation of cobalt (II) complexes was performed by adding a slight excess of NOPF<sub>6</sub> to dry acetonitrile solution of the complex and then by removing the acetonitrile solution by rotary evaporation. The complex was then re-dissolved in acetonitrile and a large amount of KPF<sub>6</sub> was added to the solution. The final product was precipitated with diethyl ether, filtered, dried under vacuum and used without further purification. It is characterized using <sup>1</sup>H NMR and COSY shown in Figure S1,S2,S3 and S4

All the synthesis was carried out using the already reported procedures.<sup>1,2,3,4</sup>

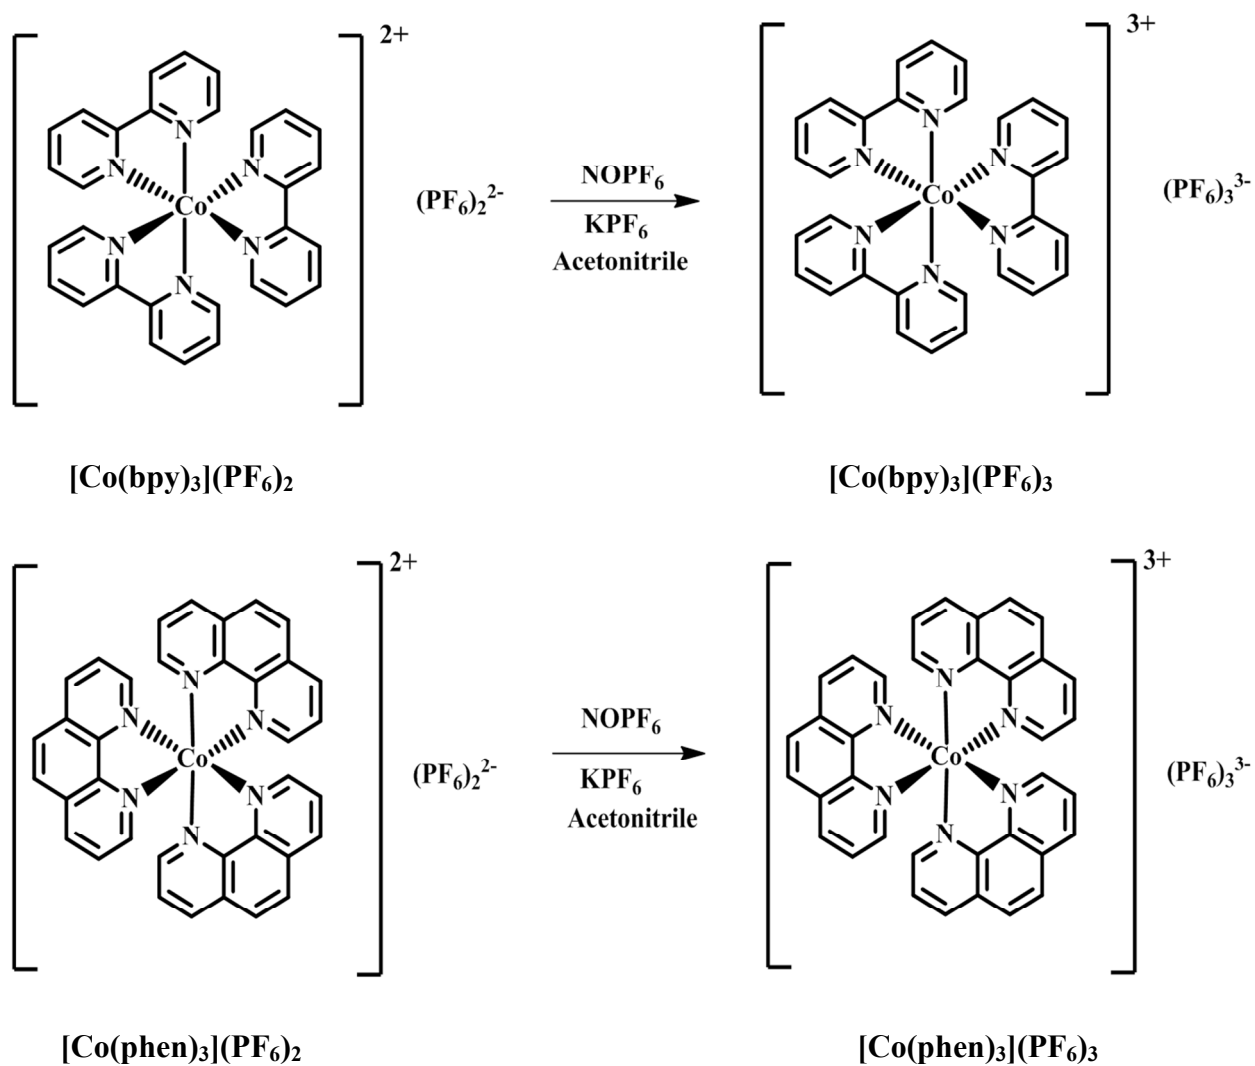

**Synthesis of cobalt (II) trisbipyridine hexafluorophosphate [Co(bpy)<sub>3</sub>](PF<sub>6</sub>)<sub>2</sub> and cobalt (III) trisbipyridine hexafluorophosphate [Co(bpy)<sub>3</sub>](PF<sub>6</sub>)<sub>3</sub>**

[Co(bpy)<sub>3</sub>](PF<sub>6</sub>)<sub>2</sub>: 3g (0.0126moles) of cobalt dichloride hexahydrate, 5.9g (0.0378moles) of 2,2'-bipyridine excess amount of potassium hexafluorophosphate. Yield-71.83%

[Co(bpy)<sub>3</sub>](PF<sub>6</sub>)<sub>3</sub>: 2g of [Co(bpy)<sub>3</sub>](PF<sub>6</sub>)<sub>2</sub>, Catalytic amount of NOPF<sub>6</sub>, excess amount of potassium hexafluorophosphate. Yield-98%

<sup>1</sup>H NMR (CD<sub>3</sub>CN, 500MHz): δ 6 (d,1H), 7.739-7.709 (m, 1H), 8.484-8.450 (m, 1H), 8.6 (dd, 1H, J<sub>1</sub>=1, J<sub>2</sub>=8) ppm.

**Synthesis of cobalt (II) trisphenanthroline hexafluorophosphate [Co(phen)<sub>3</sub>](PF<sub>6</sub>)<sub>2</sub> and cobalt (III) trisphenanthroline hexafluorophosphate [Co(phen)<sub>3</sub>](PF<sub>6</sub>)<sub>3</sub>**

For [Co(phen)<sub>3</sub>](PF<sub>6</sub>)<sub>2</sub>: 2g (0.00845 moles) of cobalt dichloride hexahydrate 4.99 g (0.0252 moles) phenanthroline, excess amount of potassium hexafluorophosphate. Yield-90.33%

For [Co(phen)<sub>3</sub>](PF<sub>6</sub>)<sub>3</sub>: 1g of [Co(phen)<sub>3</sub>](PF<sub>6</sub>)<sub>2</sub>, Catalytic amount of NOPF<sub>6</sub>, excess amount of potassium hexafluorophosphate. Yield-22%

<sup>1</sup>H NMR (CD<sub>3</sub>CN, 500 MHz): δ 5.5 (d, 1H), 7.8 (dd, 1H, J<sub>1</sub>=5.5, J<sub>2</sub>=8), 8.4 (s, 1H), 9 (dd, 1H, J<sub>1</sub>=1, J<sub>2</sub>=8.5) ppm.

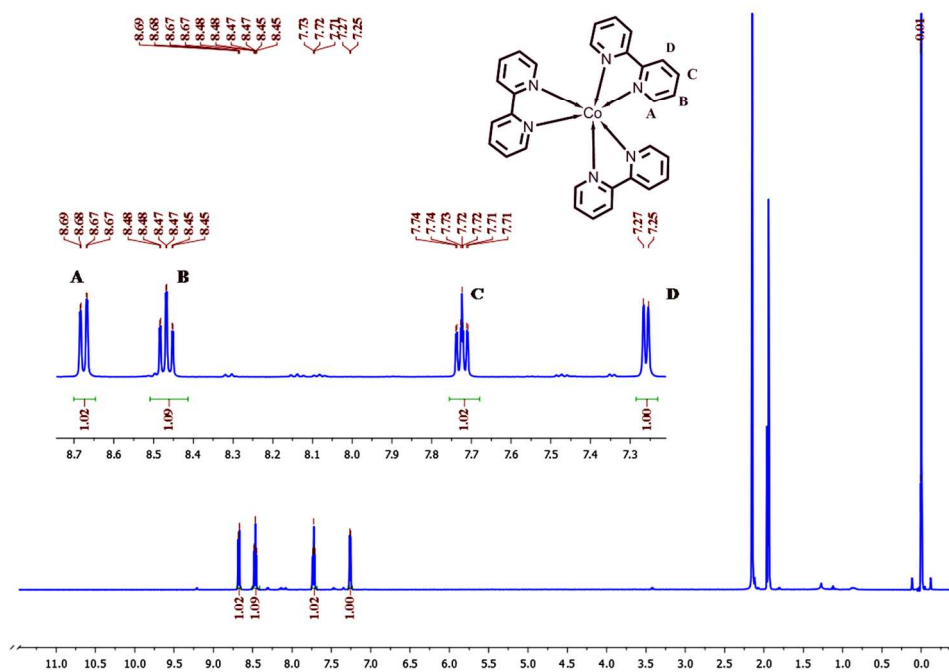

Figure S1.  $^1\text{H}$ NMR of  $[\text{Co}(\text{bpy})_3](\text{PF}_6)_3$ .

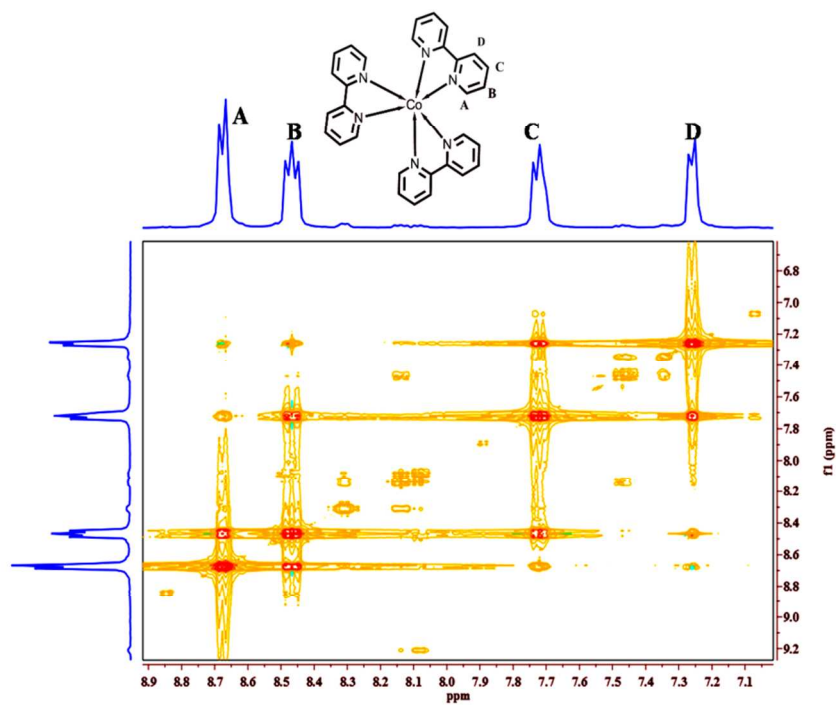

Figure S2. COSY of  $[\text{Co}(\text{bpy})_3](\text{PF}_6)_3$ .

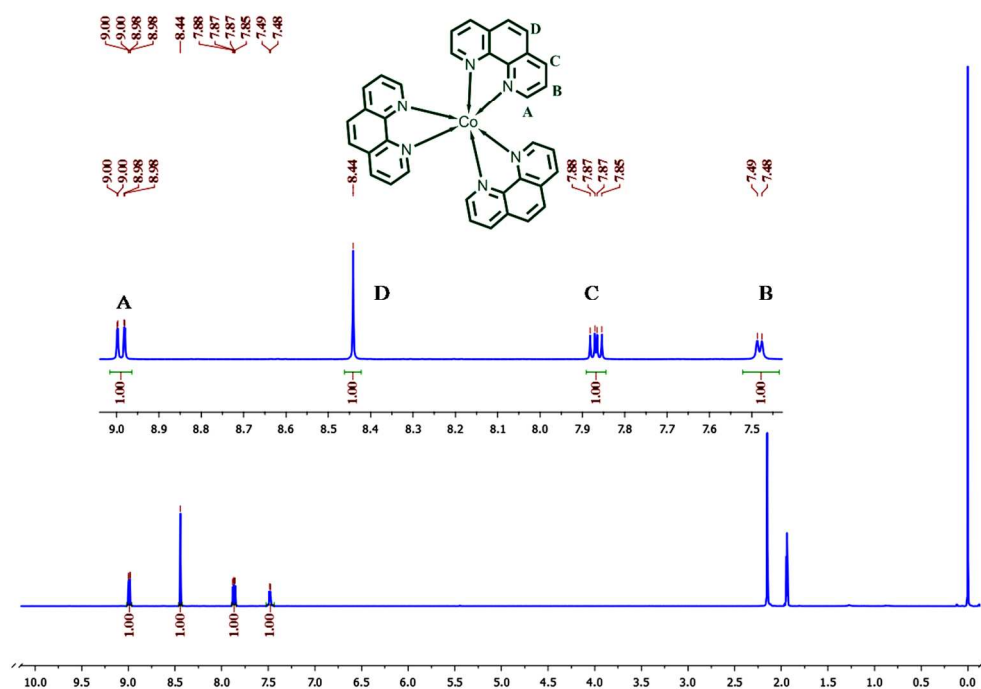

Figure S3.  $^1\text{H}$  NMR of  $[\text{Co}(\text{phen})_3](\text{PF}_6)_3$ .

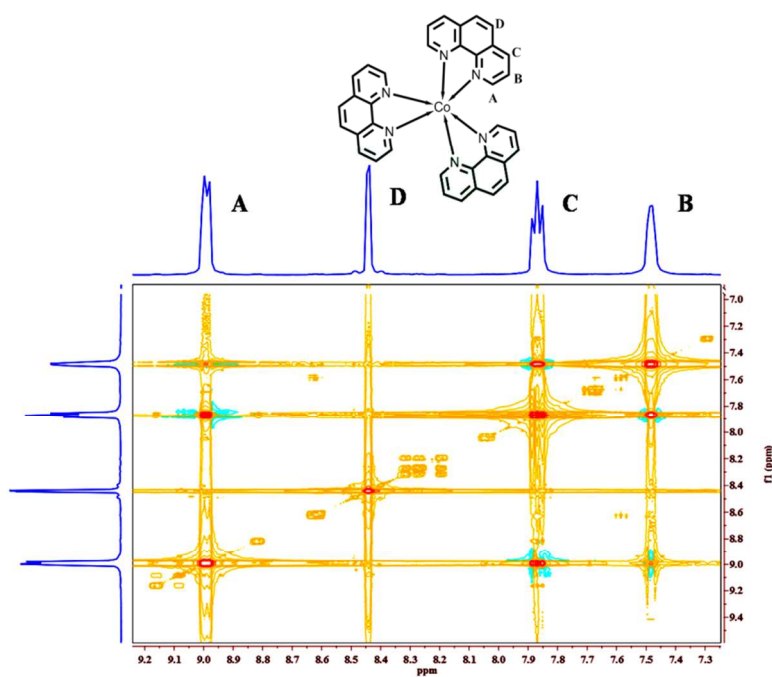

Figure S4. COSY of  $[\text{Co}(\text{phen})_3](\text{PF}_6)_3$ .

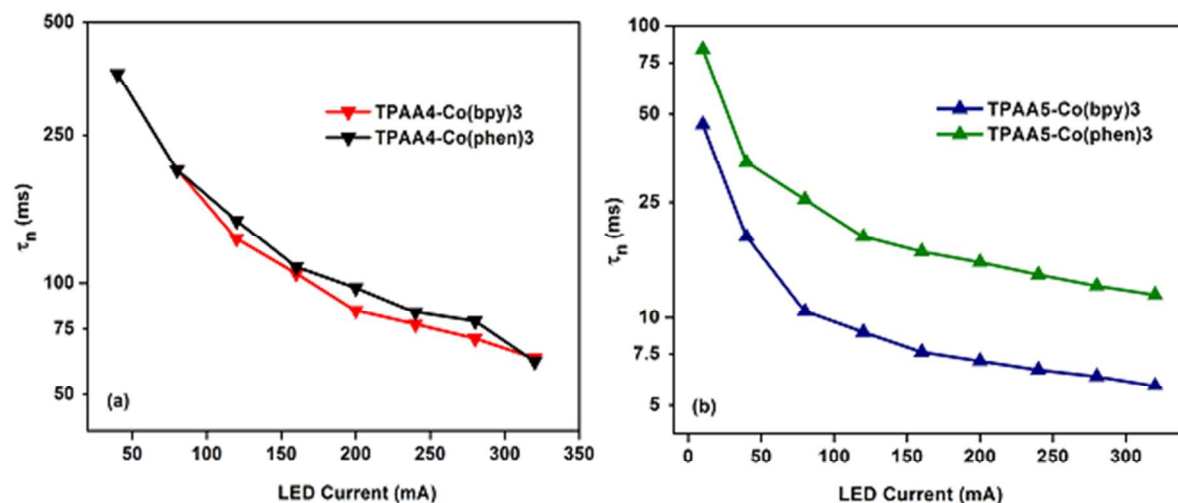

**Figure S5.** Electron Lifetime as a function of LED current measured by IMVS technique for devices fabricated using (a) TPAA4 employing  $[\text{Co}(\text{bpy})_3]^{3+/2+}$  and  $[\text{Co}(\text{phen})_3]^{3+/2+}$  (b) TPAA5 employing  $[\text{Co}(\text{bpy})_3]^{3+/2+}$  and  $[\text{Co}(\text{phen})_3]^{3+/2+}$ .

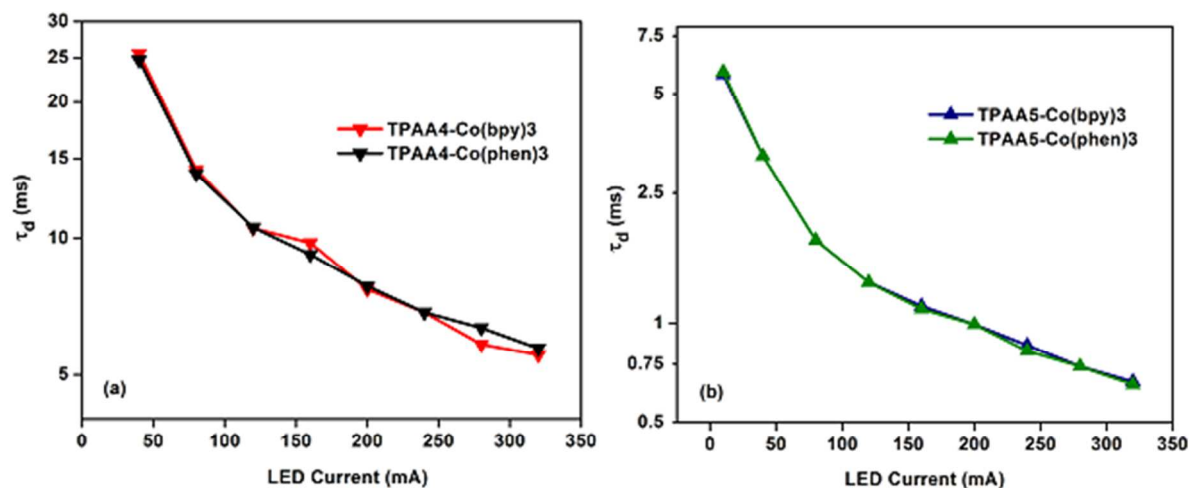

**Figure S6.** Transport time as a function of LED current measured by IMPS technique for devices fabricated using (a) TPAA4 employing  $[\text{Co}(\text{bpy})_3]^{3+/2+}$  and  $[\text{Co}(\text{phen})_3]^{3+/2+}$  (b) TPAA5 employing  $[\text{Co}(\text{bpy})_3]^{3+/2+}$  and  $[\text{Co}(\text{phen})_3]^{3+/2+}$ .

## REFERENCES

- 1) Nusbaumer, H.; Moser, J. E.; Zakeeruddin, S. M.; Nazeeruddin, M. K.; Grätzel, M.  $\text{Co}^{\text{II}}(\text{dbbip})_2^{2+}$  Complex Rivals Tri-iodide/Iodide Redox Mediator in Dye-Sensitized Photovoltaic Cells. *J. Phys.Chem. B* **2001**, *105*, 10461-10464.
- 2) Sapp, S. A.; Elliott, C. M.; Contado, C.; Caramori, S.; Bignozzi, C. A. Substituted Polypyridine Complexes of Cobalt(II/III) as Efficient Electron-Transfer Mediators in Dye-Sensitized Solar Cells. *J. Am. Chem. Soc.* **2002**, *124*, 11215-11222
- 3) Elliott C. M., Out with both baby and bathwater. *Nat.Chem* **2011**, *3*, 188.
- 4) Soman, S,; Xie, Y,; Hamann, T. W. Cyclometalated sensitizers for DSSCs employing cobalt redox shuttles. *Polyhedron* **2014**, *82*, 139–147
